# Supplementary material for: Not ready for what's coming: Perceptions and preparedness of healthcare providers for adverse effects of climate change in Victoria, Australia
Source: Research Square preprint supplement (doi:10.21203/rs.3.rs-6644033/v1), 2025-05-26
Supplement: Supplementary file 1 [file 79241c01d14c2021c8d191fd.docx]

**Appendix 1.**

Quantitative interview questions:

Q1: Please indicate your highest degree:

Bachelor of Medicine/Surgery

Bachelor of Nursing (RN)

Masters of Practice (Nurse Practitioner)

Medical Doctor (MD)

Doctor of philosophy (PhD)

Other (please add)

Q2 What is your current position?

Registered Nurse

Nurse Practitioner

General practitioner

Specialist physician (please list specialty)

Q3 How long ago did you obtain your highest health care credential (years since graduation)?

0-3 years

4-7 years

8-10 years

11-15 years

16+ years

Q4 How long have you been in medical practice (excluding career interuptions such as child/family care, illness, long service leave, ect.) ?

0-3 years

4-7 years

8-10 years

11-15 years

16+ years

Q5 What is your preferred gender description?

Woman

Man

Non-binary/gender diverse

Free response ()

Prefer not to say

Q6 Based on the following map, where is your primary location of practice?

Major City (Melbourne)

Inner Regional victoria

Outer Regional Victoria

Remote Victoria

Q7 How many health care providers (GPs, specialists, RNs, LPNs) are employed at your primary workplace?

Sole provider

2-5

6-10

11-20

21+

Q8 On the scale below please indicate your level of familiarity with the concept of anthropogenic (human-influenced) climate change:

Level of familiarity (1-7)

1 = unfamiliar

4 = Somewhat familiar

7 = Very familiar

Q9 Please indicate which sources have been most influential on your current understanding of AGCC?

Mass media (TV, Newspaper, News, Website)

Social media (Facebook, Instagram, Twitter, ect.)

Peer-Reviewed Literature (Professional Journalists)

Social Contact

Other (please list)

Q10 On the scale below please indicate how politically engaged you consider yourself to be:

Level of engagement 1-7

1 = Not at all

4 = Somewhat

7 = Completely

Q11 Based upon your understanding, what adverse impact do you believe anthropogenic global climate change will have on the overall health of the patient population you serve within the next FIVE years?

Effect in 5 years 1-7

1 = No/minimal adverse effect

4 = Somewhat adverse effect

7 = Strong adverse effect

Q12 Based upon your understanding, what adverse impact do you believe anthropogenic global climate change will have on the overall health of the patient population you serve within the next TEN years?

Effect in 10 years 1-7

1 = No/minimal adverse effect

4 = Somewhat adverse effect

7 = Strong adverse effect

Q13 Please indicate your level of agreement with the following statements:
Training regarding the health effects of anthropogenic climate change should be a component of the education of health care professionals

Level of agreement 1-7

1 = Strongly disagree

4 = Agree somewhat

7 = Strongly agree

Q14 Please indicate the highest level of specific professional development or educational training you have undergone regarding the possible effects of anthropogenic global climate change effects on human health?

None

Self driven online research

Formal training during professional education

Professional development training after completion of education

Q15 Please indicate your level of agreement with the following statement:

Anthropogenic climate change will have a disproportionate impact on human health in regional and rural areas compared to metropolitan areas

Level of agreement 1-7

1 = Strongly disagree

4 = Agree somewhat

7 = Strongly agree

Q16 Based upon your clinical knowledge and experience, please indicate which patient groups, if any, you believe would be disproportionately affected by anthropogenic climate change if it contributes at its present rate. Please tick all that apply

No patient groups will be affected more than any others

Elderly patients (aged 65+)

Overweight or obese patients

Patients with asthma or other respiratory ailments

Patients with cardiovascular disease

Patients with chronic hypertension

Patients with diabetes mellitus (type 1 or 2)

Children (aged 0-16 years)

Patients with allergies

Patients with fair skin or actinic keratoses

Patients with mental health issues

Other patient groups (please list)

Q17 Based upon your clinical knowledge and understanding, please indicate your level of concern regarding the potential effects of anthropogenic global climate change on the types and geographic range of infectious diseases, including diseases spread by human to human and zoonotic transmission.

Level of concern 1-7

1 = No or mild concern

4 = Moderate concern

7 = Serious concern

Q18 Based upon your current knowledge surrounding the potential health effects of anthropogenic global climate change as well as your clinical knowledge and experience, please indicate how willing you would be to implement changes to your practices suggested from research on the potential health effects:

Level of willingness 1-7

1 = Not willing

4 = Somewhat willing

7 = Very willing

Q19 Please indicate your level of agreement with the following statement:

Based on my current understanding of the potential health effects of anthropogenic global climate change, my current practices are sufficient to tackle any potential health effects on my patient population.

Level of agreement 1-7

1 = Strongly disagree

4 = Agree somewhat

7 = Strongly agree

Q20 Please indicate your level of agreement with the following statement:

The health care sector contributes significantly to anthropogenic global climate change, thus, it is the responsibility of practitioners to educate themselves and reduce the impact of their clinical practice wherever possible.

Level of agreement 1-7

1 = Strongly disagree

4 = Agree somewhat

7 = Strongly agree

Q21 Based upon your clinical knowledge and understanding, please indicate your level of concern regarding the potential effects of anthropogenic global climate change on the mental health of your patient population.

Level of concern 1-7

1 = No or mild concern

4 = Moderate concern

7 = Serious concern

**Appendix 2.**

**Qualitative interview questions:**

What are your concerns about AGCC as it relates to medical practice?

- Could you please elaborate on these concerns a little bit more?
- Medical practice: your delivery of care to your patient population

Do you think that AGCC presents a special problem for health care providers in rural or remote regions? Why or why not?

Moving on to the health impacts associated with climate change. Could you identify if any patient populations may be more vulnerable than others? Why?

- Which are of particular importance to you?

I want to talk to you about professional training specifically surrounding the impact AGCC might have on medical care. What are your views on professional education or training for health care providers in this area?

At what stage of training do you think health care professionals should be exposed to information about AGCC?

Have you discussed this interview with any of your colleagues?

- Did you find they had similar views to yourself?

Is there anything that you would like to add or expand upon?
